# Supplementary material
Source: PubMed Central journal article supplement (PMC2597545)
Supplement: NIHMS62753-supplement-1si20070908_01.pdf [file NIHMS62753-supplement-1si20070908_01.pdf]

## Supporting Information

# Hyperpolarized $^{89}\text{Y}$ offers the potential of direct imaging of metal ions in biological systems by magnetic resonance

Matthew Merritt,<sup>1</sup> Crystal Harrison,<sup>2</sup> Zoltan Kovacs,<sup>1</sup> Preeti Kshirsagar,<sup>1</sup> Craig R. Malloy<sup>1</sup> & A. Dean Sherry<sup>1,2</sup>

1) Advanced Imaging Research Center, University of Texas Southwestern Medical Center, 5323 Harry Hines Blvd., Dallas, TX 75390-8568

2) The University of Texas at Dallas, PO Box 830688, Richardson, TX 75083-0688

### Preparation of $^{89}\text{Y}$ complexes.

Equivalent amounts of freshly prepared  $\text{Y}(\text{OH})_3$  was added to DTPA (Aldrich), DOTA (Macrocyclics) or DOTP (Macrocyclics) in water and the pH of the reaction mixture was brought to 5 by the addition of NaOH solution (2M). The reaction mixtures were stirred at 40°C for 24 hours and the final pH was adjusted to 6 for  $\text{Y}(\text{DTPA})^{2-}$  and  $\text{Y}(\text{DOTA})^-$  and to 9 for  $\text{Y}(\text{DOTP})^{5-}$ . The solutions were filtered and freeze-dried to give quantitative yields of the salt free complexes.

### Hyperpolarization experiments.

16.6 mM (Tris{8-carboxyl-2,2,6,6-tetra[2-(1-hydroxyethyl)]-benzo(1,2-d:4,5-d')bis(1,3)dithiole-4-yl}methyl sodium salt) radical in equal parts water/glycerol was used as a glassing matrix for the samples. To each sample was added a volume of glassing agent equal to the initial sample volume. The sample was then placed in the hyperpolarizer. 20  $\mu\text{L}$  of  $\text{YCl}_3$  (3.0 M) and  $\text{Y}(\text{DTPA})^{2-}$  (1.52 M) or 40  $\mu\text{L}$  of  $\text{Y}(\text{DOTA})^-$  (0.788 M),  $\text{Y}(\text{DOTP})^{5-}$  (1.0 M), and  $\text{Y}(\text{DOTP})^{5-}$  (0.5 M) were each polarized for  $75 \pm 5$  min with a microwave irradiation of 100 mW at 94.118 GHz. The temperature was held at 1.4K during the polarization process. The samples were each then removed by injection of 4 mL of a solution of 850  $\mu\text{M}$  EDTA in  $\text{H}_2\text{O}$ . 1.5 mL of the solution was subsequently transferred to an 8

mm NMR tube. This volume filled the detection coil only, thereby removing effects of diffusion that artificially increase the apparent  $T_1$  of the sample.

### Spectrometer

$^{86}\text{Y}$  NMR spectra were recorded using a Varian 600 MHz NMR system in a 10 mm broad band probe tuned to 29.4 MHz. A single scan with a flip angle of 10 degrees ( $5.5 \mu\text{s}$ ) was taken every 11 seconds (interpulse delay = 10 s, acquisition time = 1 s) starting approximately  $30 \pm 1$  seconds after ejection from the HyperSense device. Data collection continued until the signal was no longer distinguishable from the noise. The total number of 1 scan acquisitions for each sample was:  $\text{YCl}_3$  – 100 scans,  $\text{Y(DTPA)}^{2-}$  – 90 scans,  $\text{Y(DOTA)}^-$  – 117 scans, and both  $\text{Y(DOTP)}^{5-}$  samples – 38 scans. The samples were each followed by collecting a thermal signal from 1.5 mL of  $\text{YCl}_3$  (3 M) using a flip angle of 90 degrees ( $49.5 \mu\text{s}$ ) and a single scan with the same receiver gain settings. Polarization enhancements were calculated by comparing the integrated areas of the signal from the first acquisition from the hyperpolarized samples and that from the  $\text{YCl}_3$  standard in Matlab (MathWorks, USA), taking into account the final concentrations and the difference in flip angles.

Patyal, et al.,<sup>[1]</sup> had previously outlined a different method by which the polarization enhancement and the  $T_1$ 's of hyperpolarized samples could be measured. Due to the low sensitivity for their thermally polarized gas samples, the pulse flip angle had to be calibrated on the fly with a hyperpolarized sample. In our case, the flip angle is calibrated with a standard. Therefore, the following expression can be fitted as a function of number of inspection pulses to estimate the  $T_1$  of the hyperpolarized species.

$$M_y(n) = M_p \cos^{(n-1)} \theta \sin \theta \exp^{-(n-1)TR/T_1} \quad (1)$$

$M_y$  is the transverse magnetization following a pulse of angle  $\theta$ ,  $M_p$  is the hyperpolarized Z-magnetization, TR is the experimental repetition time, and  $T_1$  is the longitudinal relaxation time. The (n-1) term in the equation is derived from the magnetization retained from the previous scan.

### References:

[1] B. R. Patyal, J. H. Gao, R. F. Williams, J. Roby, B. Saam, B. A. Rockwell, R. J. Thomas, D. J. Stolarski, *J. Magn. Reson.* **1997**, *126*, 58-65.
